# Supplementary material for: Identification of the gut commensal Candida parapsilosis as a causative fungus for the development of high fat-diet induced obesity in mice
Source: Research Square preprint supplement (doi:10.21203/rs.3.rs-739285/v1), 2021-07-26
Supplement: Supplementary file 1 [file b1670d42b301087d2345144e.docx]

**Identification of the gut commensal *Candida parapsilosis* as a causative fungus for the development of high fat-diet induced obesity in mice**

Shanshan Sun1, 2, 3, #, Li Sun1,4, #, Kai Wang1, #, Shanshan Qiao1,4, Xinyue Zhao5, Xiaomin Hu6, Wei Chen7, Shuyang Zhang5, Hantian Li1, Huanqin Dai1,4*, Hongwei Liu1,4*

1 State Key Laboratory of Mycology, Institute of Microbiology, Chinese Academy of Sciences, Beijing 100101, China

2 School of Life Sciences, University of Science and Technology of China, Hefei, China

3 The Second Hospital of Anhui Medical University, Hefei, China

4 University of Chinese Academy of Sciences, Beijing, 100049, China

5 Department of Cardiology, Peking Union Medical College Hospital, Chinese Academy of Medical Science & Peking Union Medical College, Beijing, 100730, China

6 Department of Medical Research Center, State Key Laboratory of Complex Severe and Rare Diseases, Peking Union Medical College Hospital, Chinese Academy of Medical Science & Peking Union Medical College, Beijing, 100730, China

7 Department of Clinical Nutrition, Dept. of Health Medicine, Peking Union Medical College Hospital, Chinese Academy of Medical Sciences and Peking Union Medical College, Beijing, China

* Corresponding Author Tel: +86 10 64806074; E-mail: liuhw@im.ac.cn (H-W, Liu) or daihq@im.ac.cn (Huanqin Dai)#SS Sun, L Sun and K Wang contributed equally to this work.


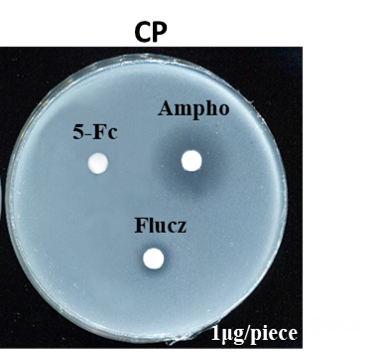


**Supplementary Figure 1.** Antifungal effect of amphotericin B, fluconazole, and 5-fluorocytosine on *C. parapsilosis*. The *C. parapsilosis* was cultured on PDA along with 1 *μ*g of amphotericin B, fluconazole, and 5-fluorocytosine in each paper disc.

**
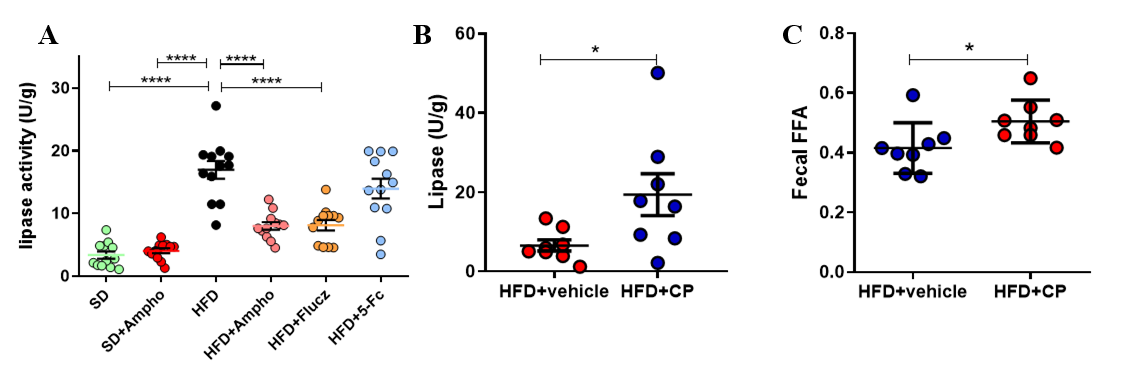
**

**Supplementary Figure 2.** The levels of lipase activity, FFA under the antifungal treatment and the oral treatment with *C. parapsilosis*. (A) Fecal lipase activity after antifungal treatment; (B) Fecal lipase activity after intragastric administration of *C. parapsilosis*; (C) Fecal FFA after intragastric administration of *C. parapsilosis.* SD, stand diet fed mice group; SD+Ampho, stand diet fed mice treated with amphotericin B; HFD, high-fat diet fed mice group; HFD+Ampho, high-fat diet fed mice treated with amphotericin B; HFD+Flucz, high-fat diet fed mice treated with fluconazole; HFD+5-Fc, high-fat diet fed mice treated with 5-fluorocytosine. HFD+vehicle, high-fat diet fed and fungi-free mice treated with PBS; HFD+CP, high-fat diet fed and fungi-free mice treated with the live *C. parapsilosis*. Data are presented as the mean ± SEM. N = 8 mice per group. Statistical analysis was performed using one-way ANOVA followed by the Tukey post hoc test for (A-C). *p < 0.05; **p < 0.01; ***p < 0.001.


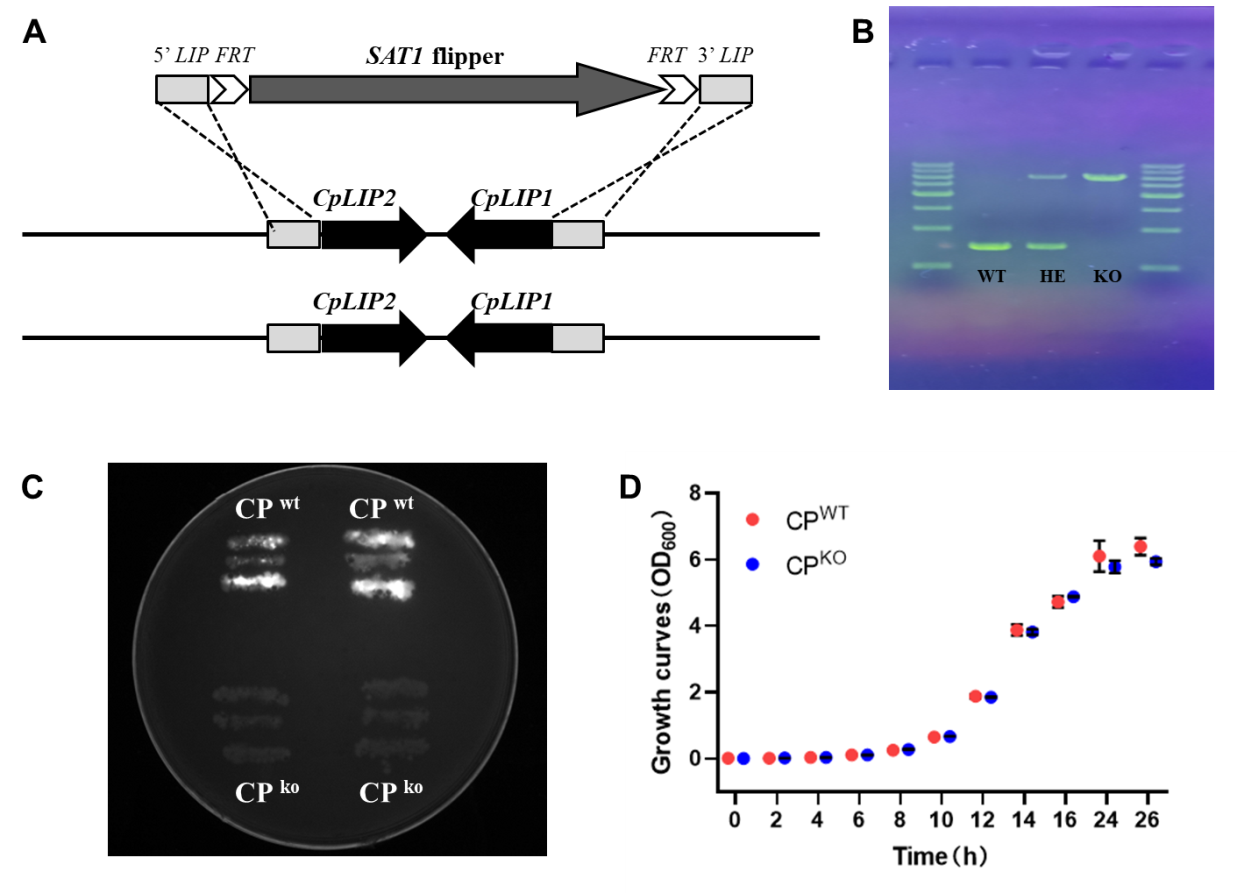
 **Supplementary Figure 3.** Construction of lipase mutant strain of *C. parapsilosis*. (A, B) Design of gene targeting for the *C. parapsilosis* lipase locus showing the SAT1 flipper cassette with the homologous *C. parapsilosis* lipase fragments 5′ *LIP* and 3′ *LIP* as well as the FLP recombination target sequences (FRT). (C) Lipolytic activity of *C. parapsilosis* (CPWT) and lipase mutants (CPKO); (D) Growth curves of *C. parapsilosis* (CPWT) and lipase-negative mutant strain of *C. parapsilosis* (CPKO) in YPD media. Statistical analysis was performed using two-way ANOVA followed by the Bonferroni post hoc test for (D).


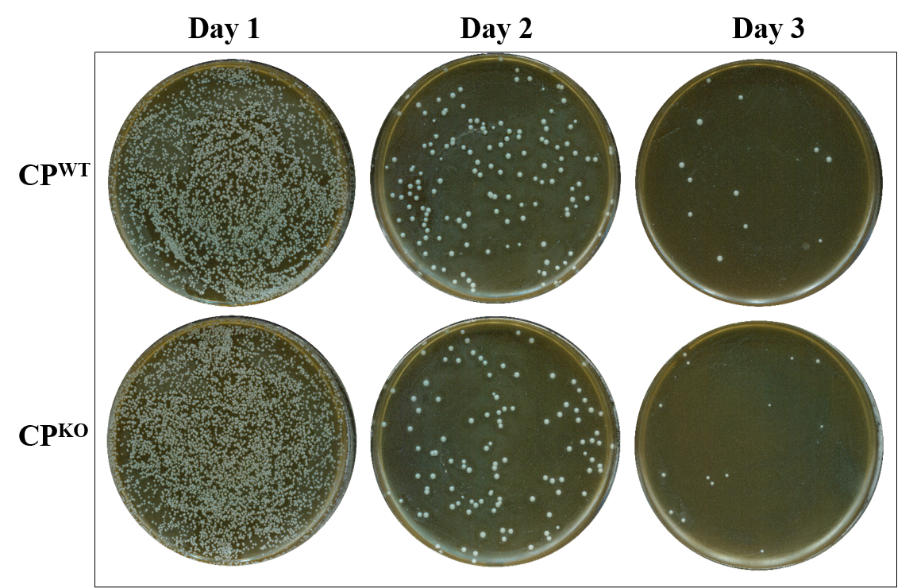


**Supplementary Figure 4.** Colonization of the wild type strain (CPWT) and the lipase-negative mutant strain of *C. parapsilosis* (CPKO) in the colon of HFD-fed mice. Feces were obtained and cultured on days 1–3 after oral administration of the wild type strain and the lipase-negative mutant strain of *C. parapsilosis* in the amphotericin B-pretreatedHFD-fed mice, respectively.


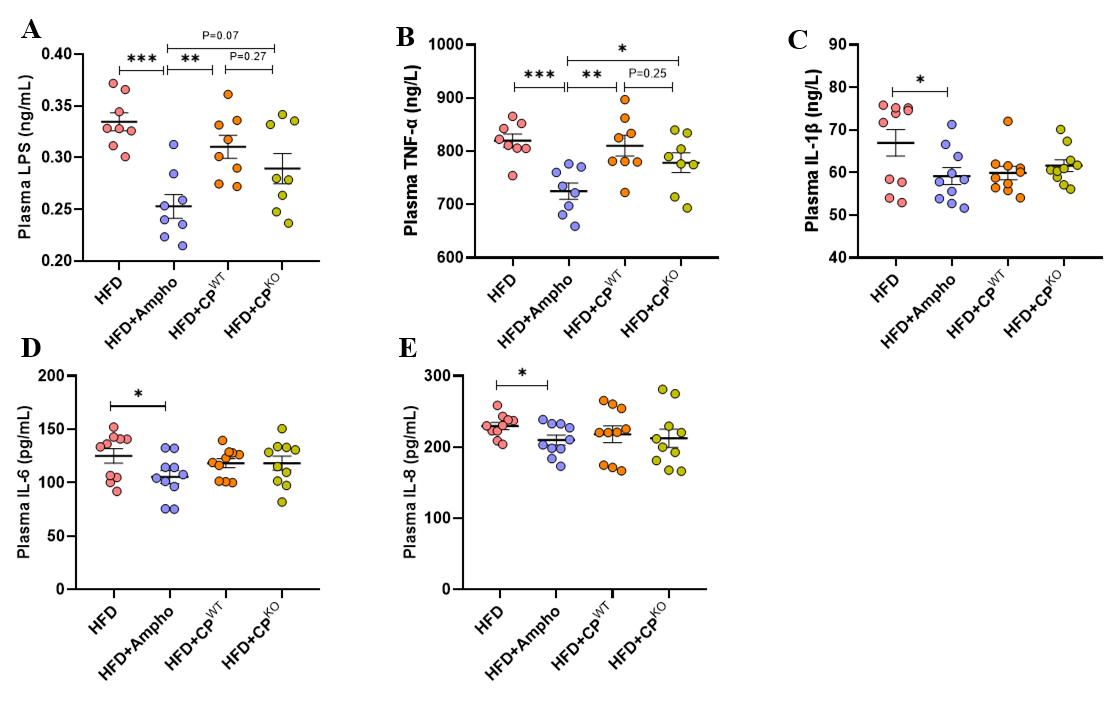
**Supplementary Figure 5.** Effects of the wild type strain and the lipase mutant strain of *C. parapsilosis* on inflammation in HFD-induced obese mice.The HFD-fed mice were pretreated by addition of AmpB in the drinking water for two weeks, and then orally given with the live *C. parapsilosis* (CPWT) or the lipase-negative mutant strain of *C. parapsilosis* (CPKO) for 7 weeks. (A) plasma LPS; (B) plasma TNF-α; (C) plasma IL-1β; (D) plasma IL-6; (E) plasma IL-8; (F) relative mRNA expression of CD36 in liver. DIO, high-fat diet fed mice; HFD+Ampho, high-fat diet fed mice treated with amphotericin B; HFD+CPWT, high-fat diet fed and fungi-free mice treated with live *C. parapsilosis*; HFD+CPKO, high-fat diet fed and fungi-free mice treated with the lipase-negative mutant strain of *C. parapsilosis.* Data are presented as the mean ± SEM. N = 7-10 mice per group. Statistical analysis was performed using one-way ANOVA followed by the Tukey post hoc test (A-E). *p < 0.05; **p < 0.01; ***p < 0.001.

**Supplementary Table S1.** Minimum inhibitory concentration (MIC80) values ([μg/mL]) of amphotericin B and fluconazole on *C. parapsilosis*.

| Drug | CP |
| --- | --- |
| amphotericin B | 6.25±0.25 |
| fluconazole | 12.5±0.55 |

**Supplementary Table 2.** Main characteristics of the samples used in this study.

| Sample name | Collection date | Clinical status | Age | Sex | BMI |
| --- | --- | --- | --- | --- | --- |
| health 1 | 2021 | Health | 32 | Male | 21.4 |
| health 2 | 2021 | Health | 35 | Male | 23.8 |
| health 3 | 2021 | Health | 57 | Male | 21.1 |
| health 4 | 2021 | Health | 33 | Female | 20.9 |
| health 5 | 2021 | Health | 33 | Female | 23.4 |
| health 6 | 2021 | Health | 35 | Female | 21.8 |
| health 7 | 2021 | Health | 36 | Male | 21.7 |
| health 8 | 2021 | Health | 42 | Male | 18.2 |
| health 9 | 2021 | Health | 57 | Male | 24 |
| obesity 1 | 2021 | Obesity | 38 | Male | 39.2 |
| obesity 2 | 2021 | Obesity | 20 | Male | 41.9 |
| obesity 3 | 2021 | Obesity | 45 | Male | 34.6 |
| obesity 4 | 2021 | Obesity | 29 | Male | 63.1 |
| obesity 5 | 2021 | Obesity | 30 | Male | 35.5 |
| obesity 6 | 2021 | Obesity | 35 | Female | 33 |
| obesity 7 | 2021 | Obesity | 34 | Female | 31.1 |
| obesity 8 | 2021 | Obesity | 28 | Female | 30.4 |

|  |
| --- |
|  |

**Supplementary Table 3.** Primer sequences used for the quantitative PCR.

| Primer Name | Sequence (5' to 3') |
| --- | --- |
| Gapdh-F | AGGTCGGTGTGAACGGATTTG |
| Gapdh-R | TGTAGACCATGTAGTTGAGGTCA |
| CD36-F  CD36-R | TCCTCTGACATTTGCAGGTCTATC  AAAGGCATTGGCTGGAAGAA |
| ITS1-F | TCCGTAGGTGAACCTGCGG |
| ITS4-R | TCCTCCGCTTATTGATATGC |
| Cpar-F | GATCAGACTTGGTATTTTGTATGTTACTCTC |
| Cpar-R | CAGAGCCACATTTCTTTGCAC |
